# Supplementary material
Source: PubMed Central journal article supplement (PMC7998347)
Supplement: jamasurg-e210979-s001.pdf [file jamasurg-e210979-s001.pdf]

## Supplemental Online Content

Chao GF, Li KY, Zhu Z, et al. Use of telehealth by surgical specialties during the COVID-19 pandemic. *JAMA Surg*. Published online March 26, 2021. doi:10.1001/jamasurg.2021.0979

**eTable 1.** Surgical Weekly New Patient Telehealth and In-Person Visit Numbers and Rates 2020

**eTable 2.** Sensitivity Analysis of Telehealth Conversion Rates with Expanded Cohorts in Period II

This supplemental material has been provided by the authors to give readers additional information about their work.

| <b>eTable 1.</b> |                          | <b>Surgical Weekly New Patient Telehealth and In-Person Visit Numbers and Rates 2020</b> |                         |                                   |
|------------------|--------------------------|------------------------------------------------------------------------------------------|-------------------------|-----------------------------------|
|                  | <b>Telehealth Visits</b> | <b>Telehealth % of 2019 Visits</b>                                                       | <b>In-Person Visits</b> | <b>In-Person % of 2019 Visits</b> |
| <b>Week 1</b>    | 1                        | 0.00%                                                                                    | 6804                    | 99.06%                            |
| <b>Week 2</b>    | 0                        | 0.01%                                                                                    | 6935                    | 100.98%                           |
| <b>Week 3</b>    | 1                        | 0.01%                                                                                    | 7107                    | 103.48%                           |
| <b>Week 4</b>    | 1                        | 0.00%                                                                                    | 7023                    | 102.25%                           |
| <b>Week 5</b>    | 0                        | 0.00%                                                                                    | 6775                    | 98.64%                            |
| <b>Week 6</b>    | 0                        | 0.00%                                                                                    | 6821                    | 99.31%                            |
| <b>Week 7</b>    | 0                        | 0.01%                                                                                    | 6561                    | 95.54%                            |
| <b>Week 8</b>    | 1                        | 0.03%                                                                                    | 6461                    | 94.09%                            |
| <b>Week 9</b>    | 2                        | 0.00%                                                                                    | 6624                    | 96.44%                            |
| <b>Week 10</b>   | 0                        | 0.04%                                                                                    | 6386                    | 94.38%                            |
| <b>Week 11</b>   | 3                        | 0.52%                                                                                    | 3494                    | 52.13%                            |
| <b>Week 12</b>   | 35                       | 3.32%                                                                                    | 1428                    | 24.42%                            |
| <b>Week 13</b>   | 225                      | 4.73%                                                                                    | 1016                    | 19.74%                            |
| <b>Week 14</b>   | 320                      | 7.08%                                                                                    | 904                     | 20.43%                            |
| <b>Week 15</b>   | 479                      | 8.17%                                                                                    | 1063                    | 23.87%                            |
| <b>Week 16</b>   | 553                      | 7.73%                                                                                    | 1246                    | 26.13%                            |
| <b>Week 17</b>   | 523                      | 7.53%                                                                                    | 1482                    | 29.43%                            |
| <b>Week 18</b>   | 510                      | 7.12%                                                                                    | 2339                    | 41.67%                            |
| <b>Week 19</b>   | 482                      | 6.26%                                                                                    | 2821                    | 47.94%                            |
| <b>Week 20</b>   | 424                      | 5.79%                                                                                    | 3388                    | 55.84%                            |
| <b>Week 21</b>   | 392                      | 3.59%                                                                                    | 3115                    | 49.61%                            |
| <b>Week 22</b>   | 243                      | 3.83%                                                                                    | 4661                    | 72.68%                            |
| <b>Week 23</b>   | 259                      | 3.74%                                                                                    | 5045                    | 80.05%                            |
| <b>Week 24</b>   | 247                      | 3.49%                                                                                    | 5174                    | 81.76%                            |
| <b>Week 25</b>   | 231                      | 3.04%                                                                                    | 5312                    | 83.40%                            |
| <b>Week 26</b>   | 201                      | 2.45%                                                                                    | 4772                    | 74.64%                            |
| <b>Week 27</b>   | 162                      | 2.60%                                                                                    | 5494                    | 85.71%                            |
| <b>Week 28</b>   | 172                      | 2.53%                                                                                    | 5630                    | 87.69%                            |
| <b>Week 29</b>   | 167                      | 2.33%                                                                                    | 5630                    | 87.50%                            |
| <b>Week 30</b>   | 154                      | 2.53%                                                                                    | 5697                    | 88.71%                            |
| <b>Week 31</b>   | 167                      | 2.07%                                                                                    | 5459                    | 84.65%                            |
| <b>Week 32</b>   | 137                      | 2.03%                                                                                    | 5508                    | 85.35%                            |
| <b>Week 33</b>   | 134                      | 2.12%                                                                                    | 5372                    | 83.38%                            |
| <b>Week 34</b>   | 140                      | 2.07%                                                                                    | 5352                    | 83.04%                            |
| <b>Week 35</b>   | 137                      | 2.07%                                                                                    | 5188                    | 80.55%                            |

eTable 2.

**Sensitivity Analysis of Telehealth Conversion Rates with Expanded Cohorts in Period II**

| Ranking <sup>b</sup><br>Specialty with<br>Highest Telehealth<br>Conversion | Cohort Definition <sup>a</sup>   |                                                               |                                                                            |
|----------------------------------------------------------------------------|----------------------------------|---------------------------------------------------------------|----------------------------------------------------------------------------|
|                                                                            | New Patient Visits<br>(n=88,003) | New Patient +<br>Established Patient<br>Visits<br>(n=162,527) | New Patient +<br>Established Patient +<br>Audio-Only Visits<br>(n=168,460) |
|                                                                            | Urology<br>14.3%                 | Urology<br>21.6%                                              | Urology<br>26.3%                                                           |
|                                                                            | Neurosurgery<br>13.7%            | Neurosurgery<br>18.5%                                         | Neurosurgery<br>20.4%                                                      |
|                                                                            | Obstetrics & Gynecology<br>8.4%  | Obstetrics & Gynecology<br>13.6%                              | Obstetrics & Gynecology<br>17.0%                                           |
|                                                                            | Thoracic Surgery<br>8.1%         | Thoracic Surgery<br>8.4%                                      | Thoracic Surgery<br>11.6%                                                  |
|                                                                            | Plastic Surgery<br>5.1%          | Colorectal Surgery<br>6.1%                                    | General Surgery<br>7.5%                                                    |
|                                                                            | General Surgery<br>4.9%          | General Surgery<br>6.1%                                       | Colorectal Surgery<br>7.1%                                                 |
|                                                                            | Colorectal Surgery<br>3.2%       | Plastic Surgery<br>5.4%                                       | Orthopedics<br>5.9%                                                        |
|                                                                            | Ophthalmology/ENT<br>2.4%        | Orthopedics<br>4.9%                                           | Plastic Surgery<br>5.7%                                                    |
| Specialty with Lowest<br>Telehealth<br>Conversion                          | Orthopedics<br>2.3%              | Ophthalmology/ENT<br>2.5%                                     | Ophthalmology/ENT<br>3.2%                                                  |

Abbreviation: ENT, ear, nose, and throat.

<sup>a</sup>Ranking of specialty by telehealth use is displayed.

<sup>b</sup>Telehealth conversion is reported by the mean conversion rate per week over Period II.
